# Supplementary material for: Comparative Transcriptome Profiling Reveals Two WRKY Transcription Factors Positively Regulating Polysaccharide Biosynthesis in Polygonatum cyrtonema
Source: MDPI journal article supplement (doi:10.3390/ijms241612943), 2023-08-18
Supplement: s1 [file s1]

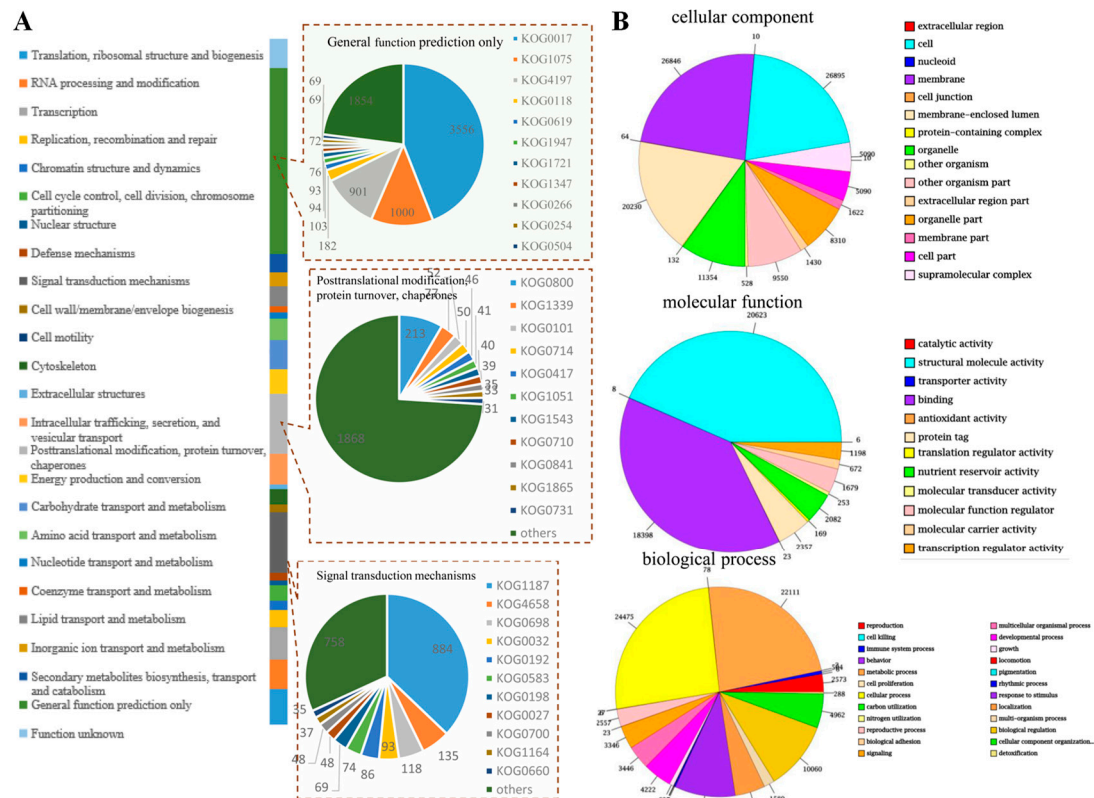

**Fig. S1.** Function classification of all unigenes (A) KOG function classification of all unigenes. (B) GO function classification results of the annotated unigenes in *Polygonatum cyrtonema*.

```

CCGGAGATTGGAATATCCAAAATACAGTACACATCATCAAGGGTAATGGT 50
CATCTCACCAAAAGGTAAATGGAATGTATTAGTCTCCGGCTGCCACCTCT 100
CAACAAATGCTGAGACTACTACCTTATTGGCATACTATAGGAACAATCA 150
ATAAGGCTCATCAAACCGGATCTCTGAATATAACCTTCCAGATGAGGTT 200
GTCTGCAATTGGACTATTTGAATCCAATGACCATTCTGTGAGTTGGTATG 250
CATGATTAAGGCATTTAAGCAATTCCCGTTCCTGGAAAATTAATACAACA 300
TAAAGTGAATTACAAATTAATTTAATTAAGCAAATAATAATTTAATTAT 350
AATATGACCAAAATAAATGAAAATCATAATACGTACACTCCCATTCCAA 400
ATCTCTGAGGCAATATGTGTCTTGAACTTCGTAAAATCCTAGGGTCCTG 450
TGGCCACCGGGAAATGGTCCTGTCAACTCCTCATGCTCAGATTCAACAG 500
CCTGCGCTTCTACATTGCTTCTACATTCAGATGCTCCTCTTCTTGAACG 550
TTTGGTTGTATAACTGGTTCATCCTGTACAACCTTGTTCCTGTCTCTA 600
TGATATATGAACTCGTCTTGCTGCATCTGCTGCACGTCGGGCTGATGCAG 650
TCGTTCTCTTTGTCCTTCGAGATGTGCCAGCCTCATCTACAAATTA 700
AAGATAGTACTGTCAAAAAAATATGATAAATGACTATACAAAATAAGCAT 750
ACCATGACTTCATATATTATAATTTTAGTAAACAAAAACAAATATTGTAC 800
AGTAGAACAAAGAAAAAATAACACATTGAATATTGTGAAAACATTTTAT 850
GTAGTAAGAAAAGGGAATAGAAGGAAATGAGTTGGGAGTTCATTAGAAAT 900
TGATAGAGAAAGTTCAGTATCTCTACAGAACGAGAGAGAGATGAGAAGC 950
TAGCAATGATCATGTGTGACACTGATCATTGCATCATTCAAAAACACAAC 1000
TGATCAATGTATATATAGCATAGAGAGAGAGAGAGAGAAAACAAAGTGGTAA 1050
TGTAATGTGAATGTGACTGTGCTAGTAAGAGTATAGTGATGAGCTCAAGT 1100
CAGCTAGCAGCAATATACAAGCAGTCAGTCGTCGGCCTAAAGAAACCGAC 1150
CAAATAGTCTTTCGTCGGCCTATTTAGGCCGACAGATTAATATTGGTTCG 1200
GTCTTAACAGGCCGACCAAATAGTAATCTGTTCGGCCTAAATAGACCGACA 1250
AAAATTAGCCAAGTCGGGTTCTCGGGGCCGACCGACTGTCGCATGAACAA 1300
ACGTTACAGAAAGTTCAAAAAACTTTAATTTTATGATTTATAATCTTAAA 1350
ACAATACCTTGATTGGTTCGAGAAGACATCTAAAGCGTTTGATAGATTCT 1400
CAAAATGAATATATCCTGAATCAAATTAATAAAAAACAATCAGTTTAACCCA 1450
AATTTTTTTCTCCAATAAATAAAAAATGAAAGAAATCGAATTAGGGTTTT 1500
CTATTAGGTACAAAGCTATAAAAACTTACCTAAATCCTTGTCTTCTTCTC 1550
TACTCCTCCTACTCTTCTTCACGATCGGCTCCTCCTCCTCTTCTTCGCGA 1600
TGGTTGTTCTCTTCTTCTTCGCGTTTTTTTTTTTTTTTTTTTACAGTCA 1650
AGTTAATTTTTTCTACTTGGTTGACTGGGTTTACTGAGCAAATCAAATGG 1700
GTATTTTTGGTATAGATAAAGGGTAACTGAGCAAATGTTGGGTTTGTT 1750
TTGGTTATGGGTTTACTGAGCAAAAAATTGGGTGCCAATAGAATTCCCCA 1800
ATGAGTTTTGAATGGGGCTACTGAGCAATTTTGGGGTTCAAATAGAATT 1850
ACCCTATG

```

  
 Translation Start Codon

**Fig. S2.** The sequence and cis elements analysis of *PcgalE1* promoter. The position of nucleotide in the promoter is opposite to the translational start site (ATG) that was marked as +1. W-box cis elements are highlighted as red color.
